# Supplementary material for: Th40 cells (CD4+CD40+ Tcells) drive a more severe form of Experimental Autoimmune Encephalomyelitis than conventional CD4 T cells
Source: PLOS journal article supplement (doi:10.1371/journal.pone.0172037), 2017-02-13

### CD4 percentage; Brain

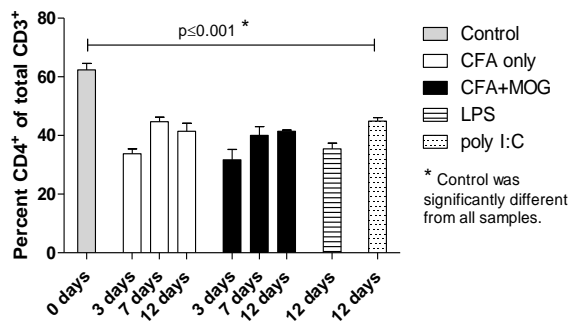

### CD4 cell numbers; Brain

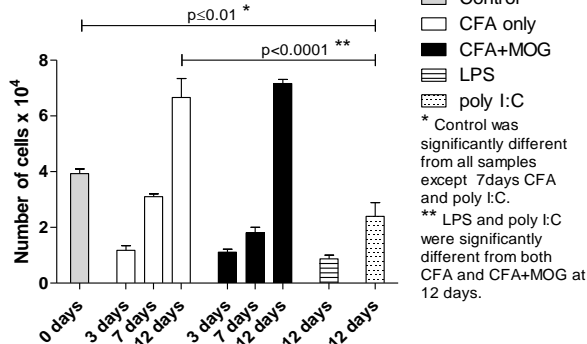

### CD8 percentage; Brain

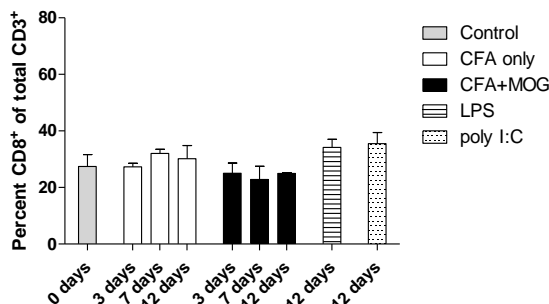

### CD8 cell numbers; Brain

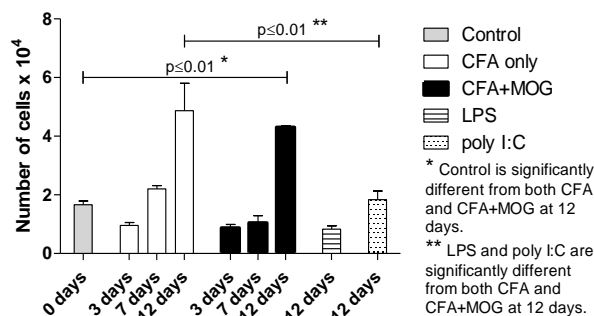

### CD40 in CD8<sup>+</sup>; Brain

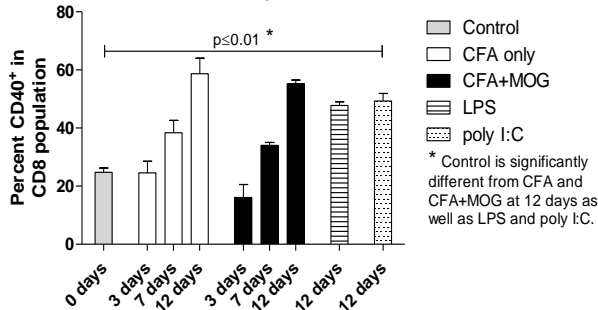

### CD4 percentage; Spinal Cord

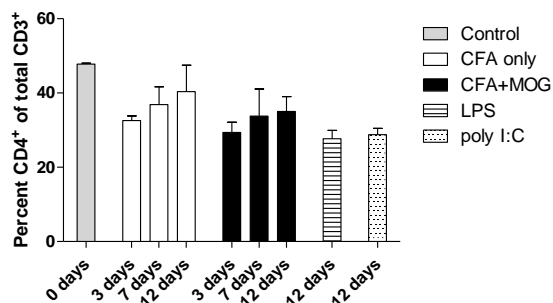

### CD4 cell numbers; Spinal Cord

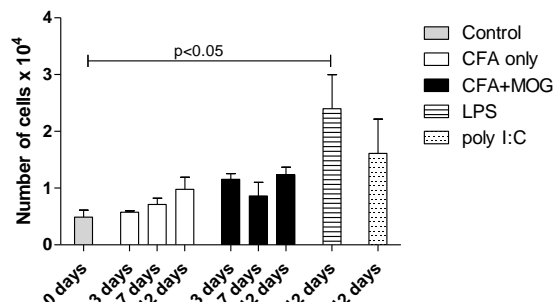

### CD8 percentage; Spinal Cord

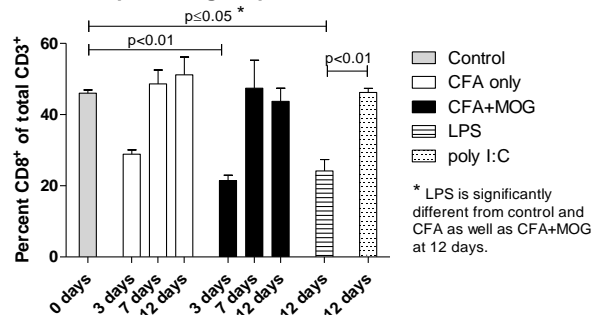

### CD8 cell numbers; Spinal Cord

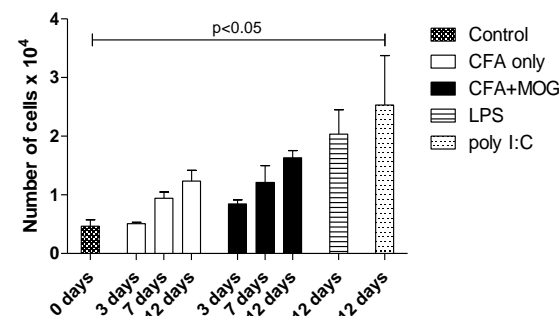

### CD40 in CD8<sup>+</sup>; Spinal cord

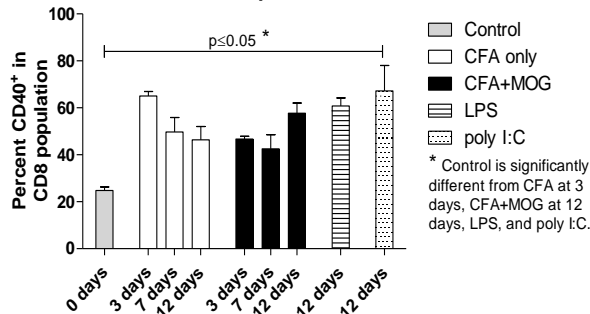

Supplement: S4 (10.1371/journal.pone.0172037.s004) [file journal.pone.0172037.s004]
